# Supplementary material
Source: PubMed Central journal article supplement (PMC8732973)

## **A novel antagonist of TRPM2 and TRPV4 channels: Carvacrol**

**Mustafa Nazırođlu<sup>1</sup>**

<sup>1</sup>Drug Discovery Unit, BSN Health, Analyses, Innovation, Consultancy, Organization, Agriculture and Trade Ltd, Isparta, TR-32260, Turkey

**Author for correspondence:**

Prof. Dr. Mustafa Nazırođlu,  
Departments of Biophysics and Neuroscience,  
Faculty of Medicine, Suleyman Demirel University,  
Isparta, TR-32260, Turkey  
Tel: +902462113708  
E-mail: [mustafanaziroglu@sdu.edu.tr](mailto:mustafanaziroglu@sdu.edu.tr)

**Running Title:** Carvacrol inhibits TRPM2 and TRPV4

**Supplementary Fig. 1. The treatment of carvacrol (CARV) diminished H<sub>2</sub>O<sub>2</sub>-mediated increase of cCa<sup>2+</sup> concentration via inhibition of TRPM2 in the BV-2 microglial cells.** (Mean ± STD). The BV-2 cells in the control (Cntr), H<sub>2</sub>O<sub>2</sub>, and H<sub>2</sub>O<sub>2</sub>+CARV groups were stained with Fluo-3 (1 μM for 60 min). After washing the cells, the cells were stimulated by H<sub>2</sub>O<sub>2</sub> (1 mM), although they were inhibited by CARV (100 μM). Representative images of Cntr, H<sub>2</sub>O<sub>2</sub>, and H<sub>2</sub>O<sub>2</sub>+CARV groups on the [Ca<sup>2+</sup>]<sub>c</sub> through TRPM2 inhibition in the confocal microscope with 40x oil objective were shown Suppl. Fig. 1a. The line and column fluorescence intensity mean values of the Fluo-3 within 150 seconds in the are shown in Cntr, H<sub>2</sub>O<sub>2</sub>, and H<sub>2</sub>O<sub>2</sub>+CARV groups are shown in the Suppl. Figs. 1b and c, respectively. The scale bar was kept as 10 μm. One example image of each figure was selected from 25-30 BV-2 cells of 6 independent experiments for each condition (<sup>a</sup>p ≤ 0.05 vs Cntr. <sup>b</sup>p ≤ 0.05 vs H<sub>2</sub>O<sub>2</sub> group).

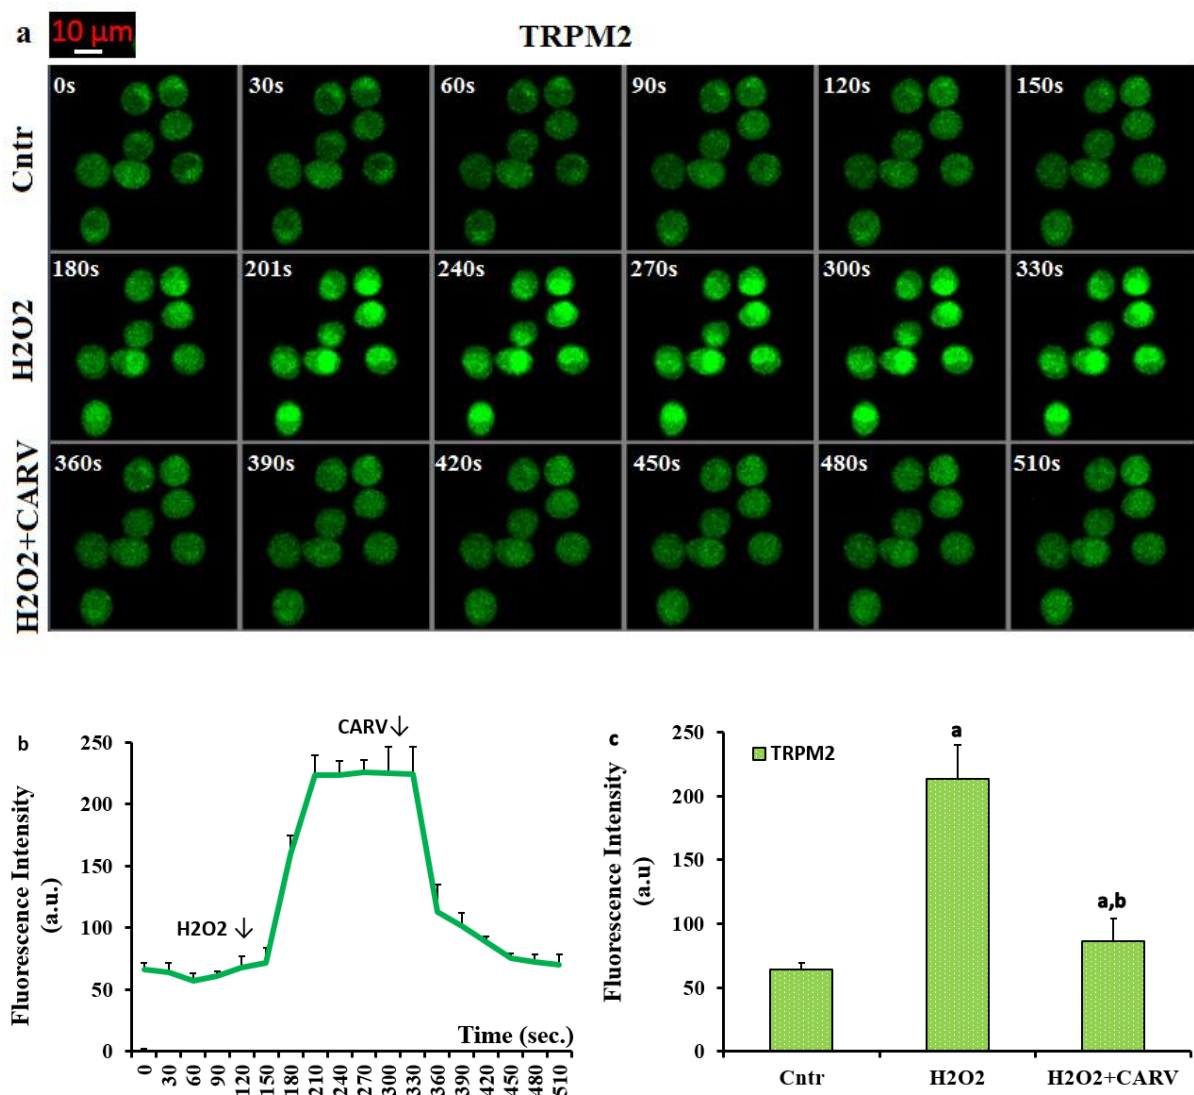

Supplement: 11011_2021_887_MOESM1_ESM.pdf [file 11011_2021_887_MOESM1_ESM.pdf]
